# Supplementary material for: Cul3-KLHL20 E3 ubiquitin ligase plays a key role in the arms race between HIV-1 Nef and host SERINC5 restriction
Source: PubMed Central journal article supplement (PMC9042822; doi:10.1038/s41467-022-30026-y), 2022-04-26
Supplement: 41467_2022_30026_MOESM1_ESM.pdf [file 41467_2022_30026_MOESM1_ESM.pdf]

## Supplementary information

### **Cul3-KLHL20 E3 ubiquitin ligase plays a key role in the arms race between HIV-1 Nef and host SERINC5 restriction**

Sunan Li<sup>1,4</sup>, Rongrong Li<sup>1,4</sup>, Iqbal Ahmad<sup>1</sup>, Xiaomeng Liu<sup>1</sup>, Silas F. Johnson<sup>2</sup>, Liangliang Sun<sup>3</sup>,  
and Yong-Hui Zheng<sup>1,2</sup>✉

<sup>1</sup>Harbin Veterinary Research Institute, CAAS-Michigan State University Joint Laboratory of Innate Immunity, State Key Laboratory of Veterinary Biotechnology, Chinese Academy of Agricultural Sciences, Harbin, China.

<sup>2</sup>Department of Microbiology and Molecular Genetics, Michigan State University, East Lansing, MI, USA.

<sup>3</sup>Department of Chemistry, Michigan State University, East Lansing, MI, USA.

<sup>4</sup>These authors contributed equally: Sunan Li, Rongrong Li.

✉ email: [zhengyo@msu.edu](mailto:zhengyo@msu.edu)

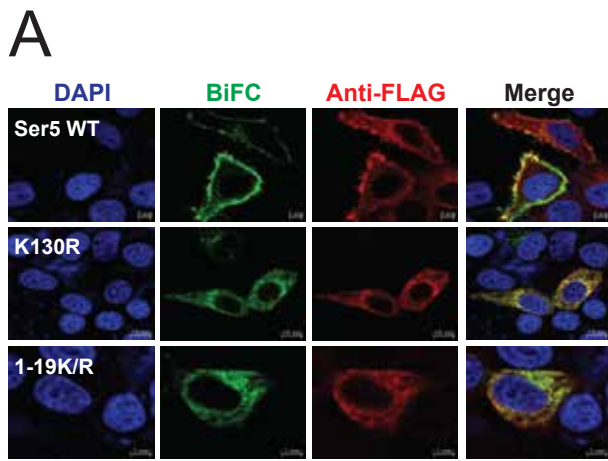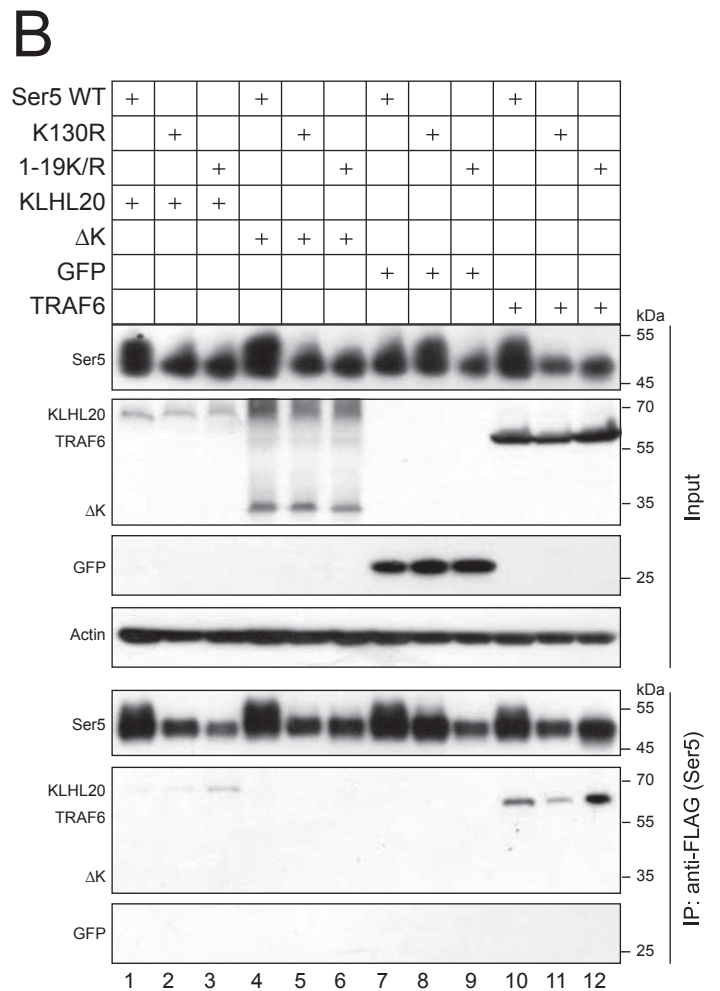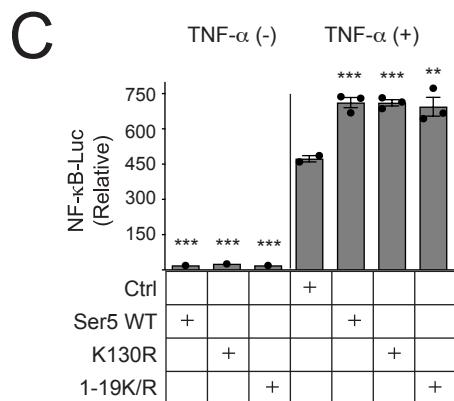

**Supplementary Fig. 1. SERINC5 K130R mutant is functional and properly folded.**

(A) Ser5-VN/Ser5-VC, K130R-VN/K130R-VC, and 1-19K/R-VN/1-19K/R-VC were expressed in pairs in HeLa cells. After staining with red-fluorescent anti-FLAG for the VN tag and DAPI for nuclei, cells were detected for expression of the green fluorescent BiFC signal and its colocalization with the red-fluorescent signal by confocal microscopy.

(B) FLAG-tagged Ser5 or its K130R and 1-19K/R mutants were expressed with HA-tagged KLHL20, its ΔK mutant, GFP, and TRAF6 in HEK293T cells. Cellular proteins were pulled down by anti-FLAG and analyzed by WB.

(C) Ser5 or its K130R and 1-19K/R mutants were expressed with a NF-κB promoter luciferase (Luc) reporter in HEK293T cells. Cells were treated with TNF-α (10 ng/mL) for 8 h. Forty-eight hours after transfection, the cells were lysed, and luciferase activities were measured. Results were shown as relative values, with that from cells remaining untreated with TNF-α as 1. Experiments were repeated twice, and similar results were obtained.

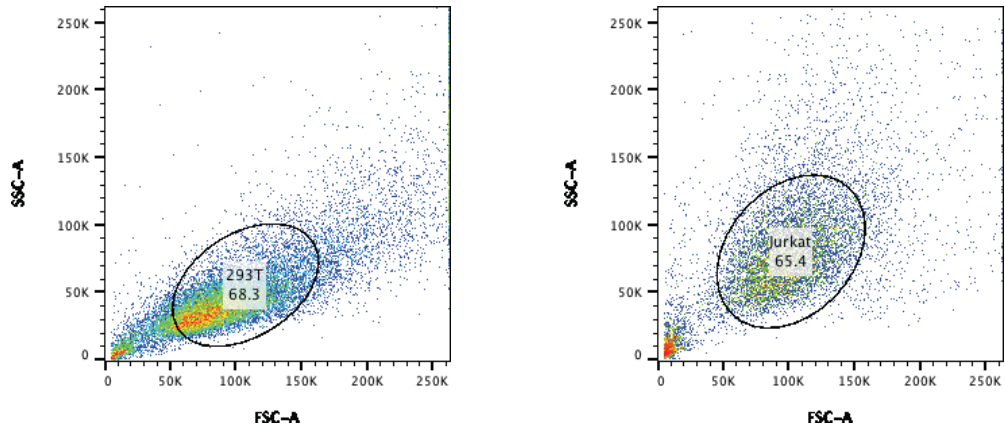

**Supplementary Fig. 2.** Gating strategy for HEK293T and Jurkat-TAG cells are shown, which was used to analyze Ser5 surface expression in Fig. 3B and Fig. 4A by flow cytometry.
